# Supplementary material for: Optimizing single cell proteomics using trapped ion mobility spectrometry for label-free experiments
Source: Royal Society of Chemistry journal article supplement (doi:10.1039/d3an00080j), 2023-01-01

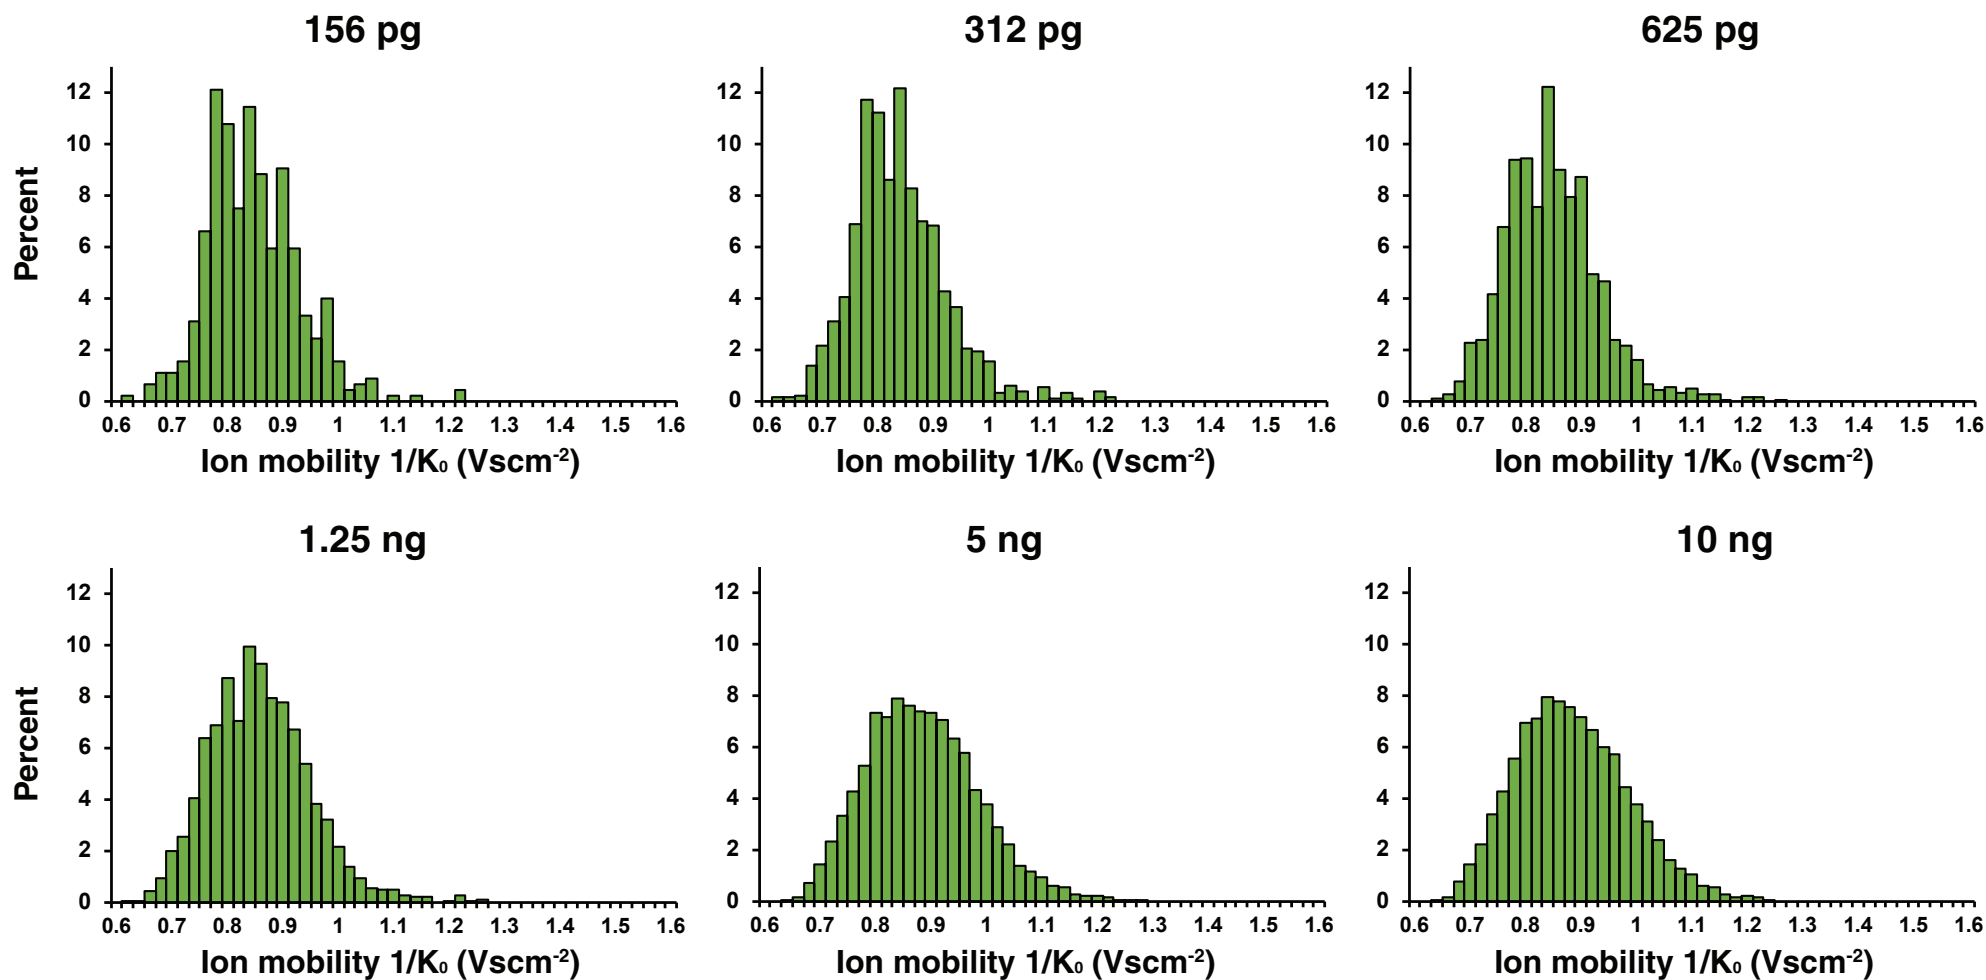

**A**

Chemokine (C-C motif) receptor 7 (CCR7)

D L G C L S Q E Q L R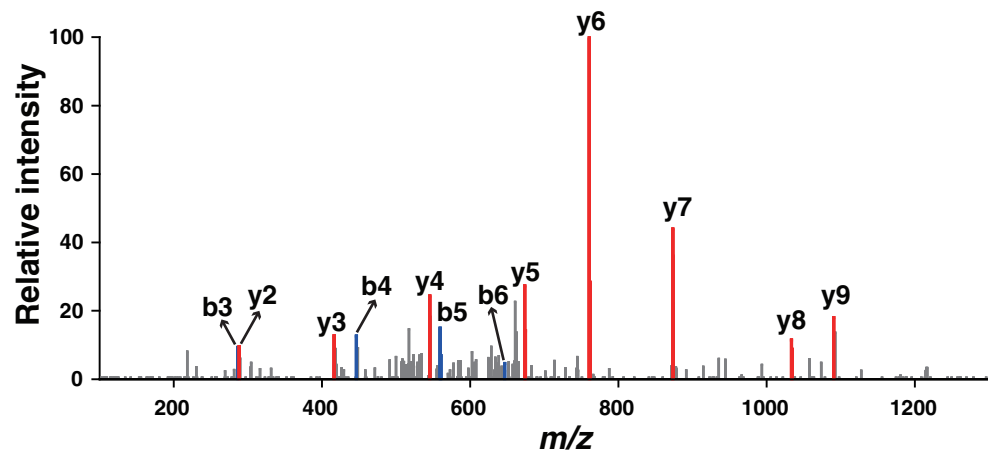**B**

CD27 antigen (CD27)

H C N S G L L V R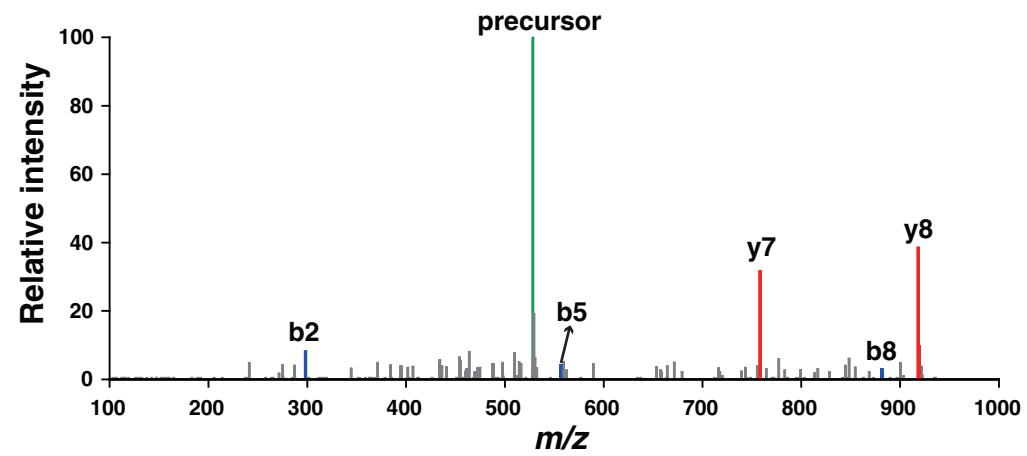**C**

DNA-binding protein SATB1 (SATB1)

A G I S Q A V F A R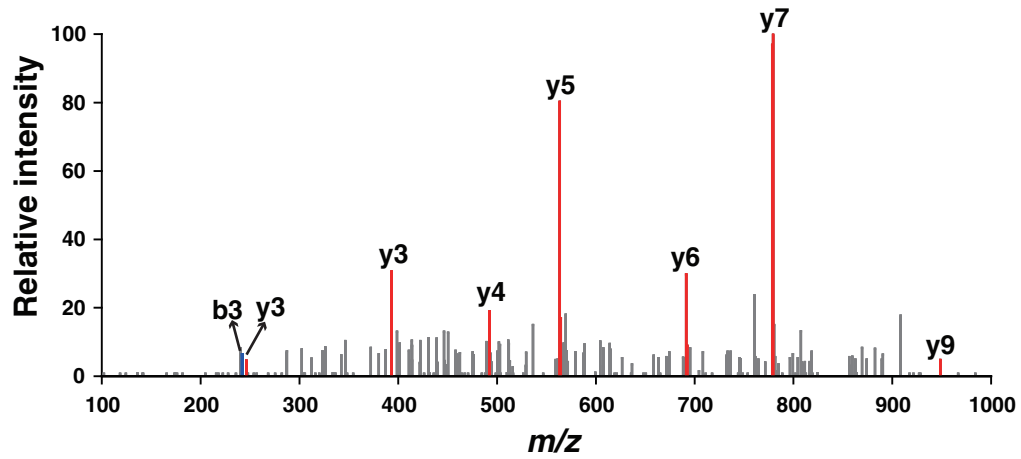

**A**

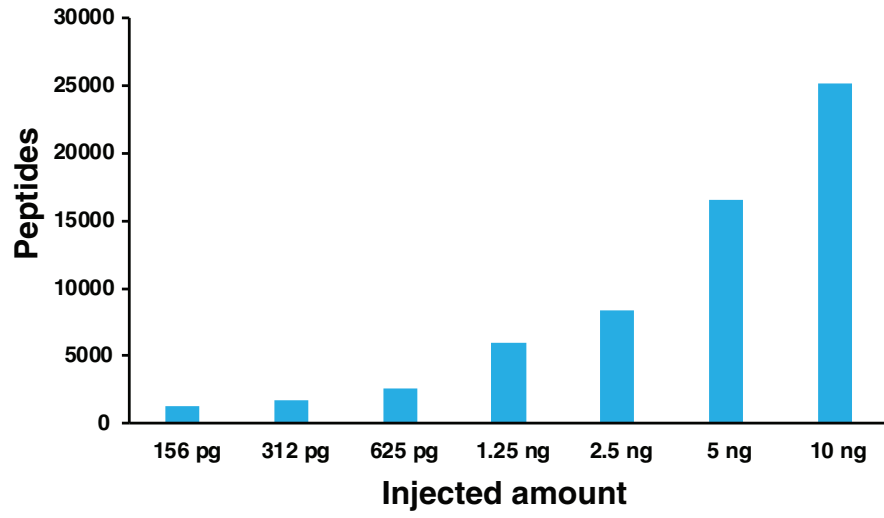

**B**

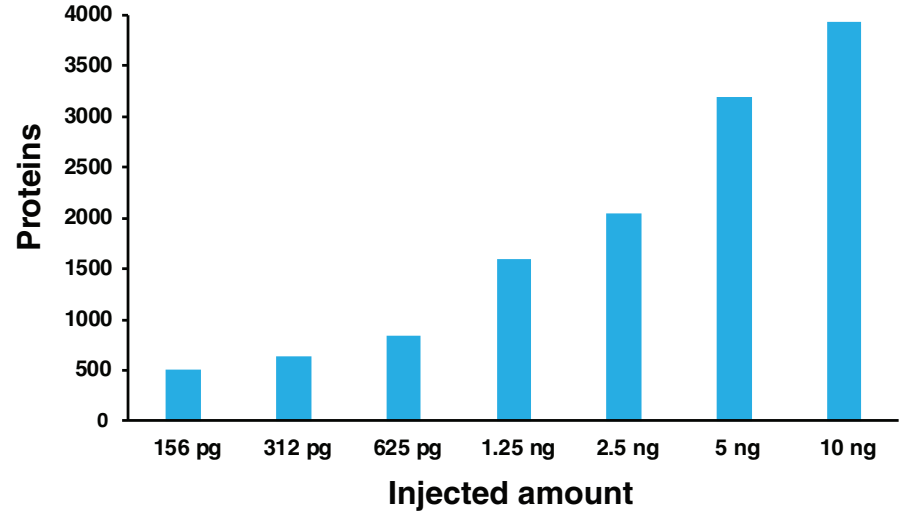

1 cell

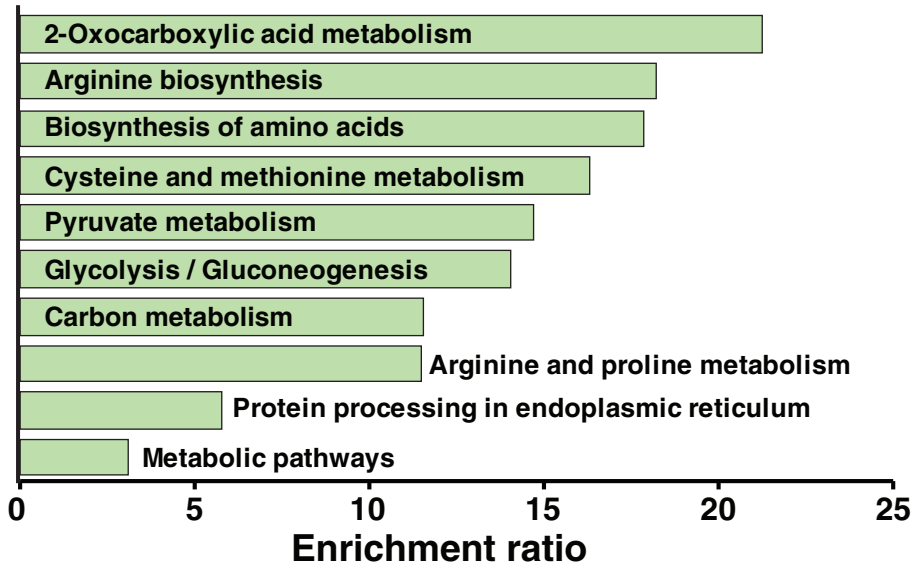

5 cells

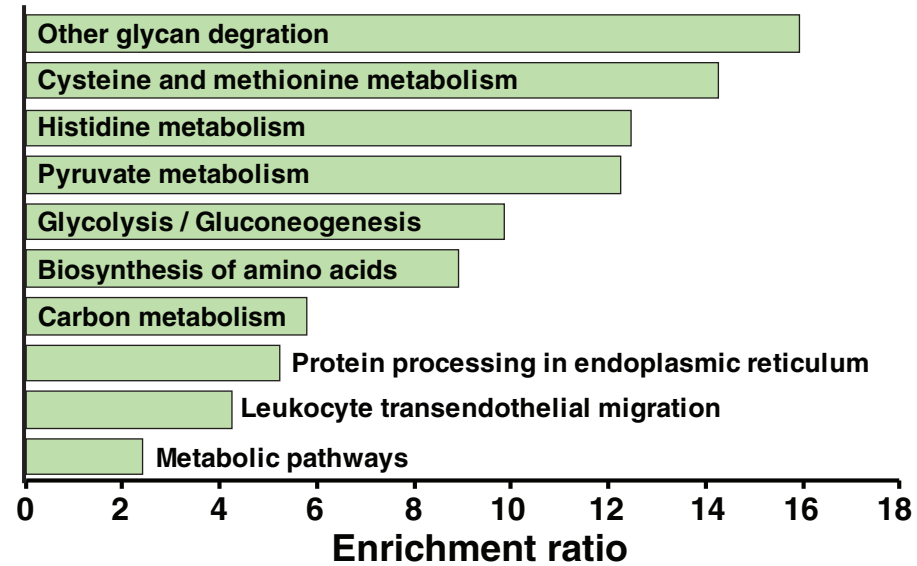

10 cells

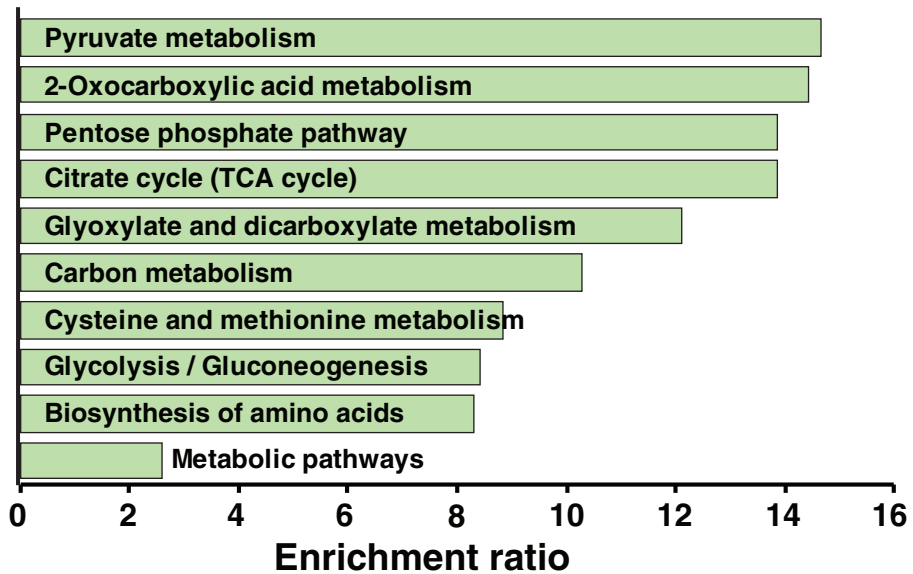

40 cells

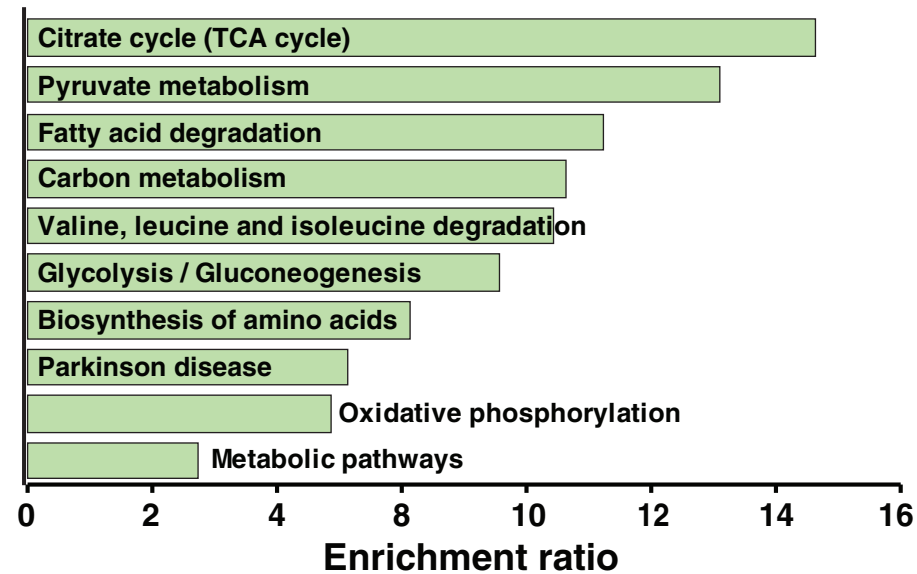

Supplement: d3an00080j1.pdf [file d3an00080j1.pdf]
